# Supplementary material for: β‐1,4‐Galactosyltransferase 1 protects against cerebral ischemia injury in mice by suppressing ferroptosis via the TAZ/Nrf2/HO‐1 signaling pathway
Source: PubMed Central journal article supplement (PMC11374693; doi:10.1111/cns.70030), 2024-09-04

## Full unedited gel/blot images

The full unedited Western Blots (WB) images are presented below, with the cropped image in the manuscript highlighted by orange rectangles.

Full unedited blot for Figure 1B

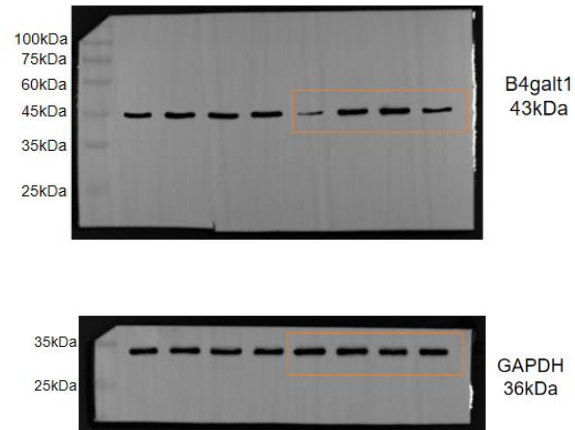

Full unedited blot for Figure 2A

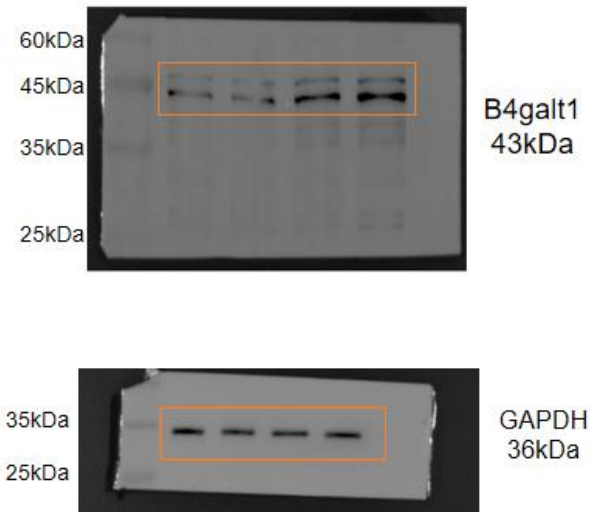

Full unedited blot for Figure 4E

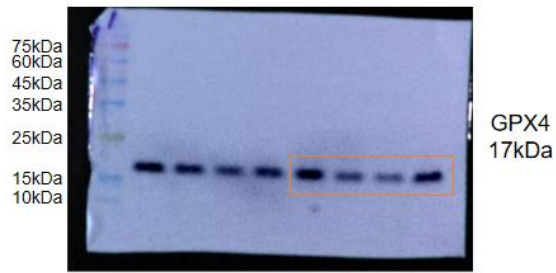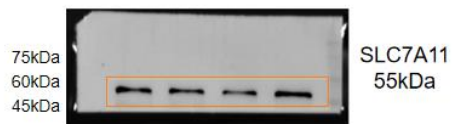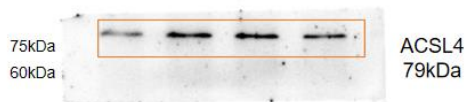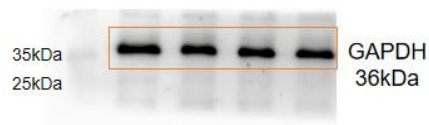

Full unedited blot for Figure 4J

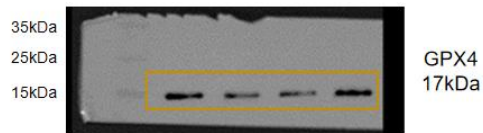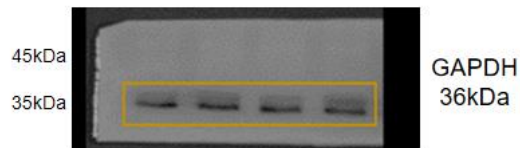

Full unedited blot for Figure 5A

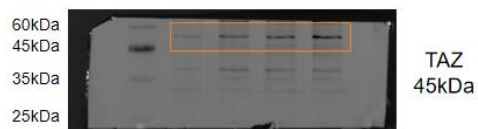

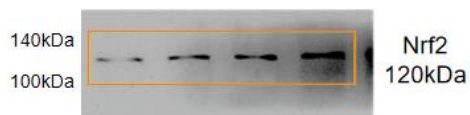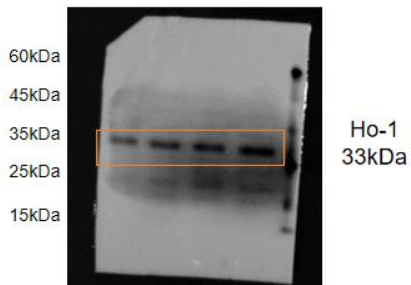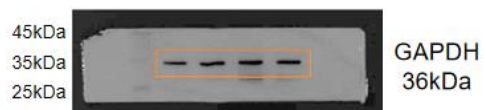

Full unedited blot for Figure 6A

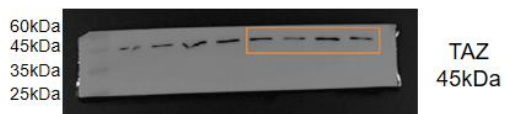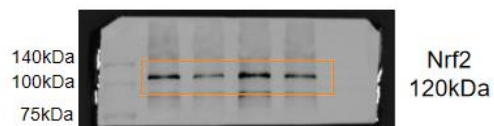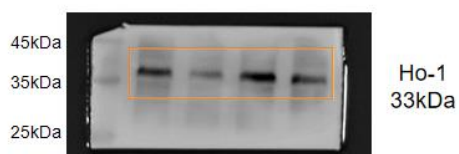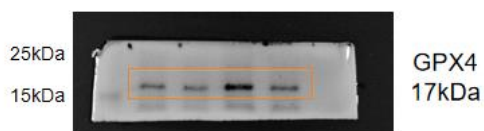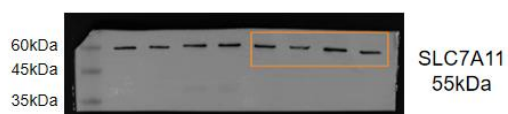

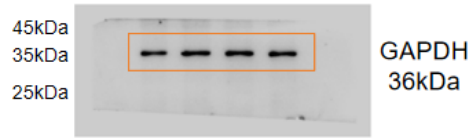

Full unedited blot for Figure 6H

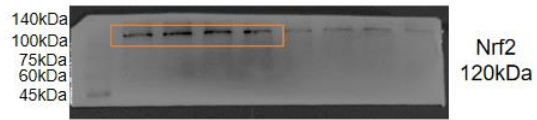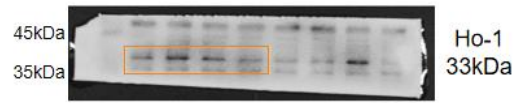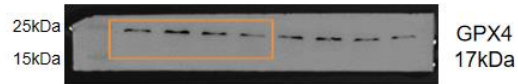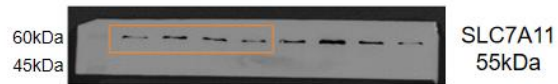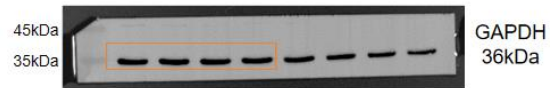

Supplement: CNS-30-e70030-s001.pdf [file CNS-30-e70030-s001.pdf]
